# Supplementary material for: CXCL12 and CXCL13 Cytokine Serum Levels Are Associated with the Magnitude and the Quality of SARS-CoV-2 Humoral Responses
Source: MDPI journal article supplement (doi:10.3390/v14122665), 2022-11-28
Supplement: s1 [file s1]

Supplementary figure S1

A

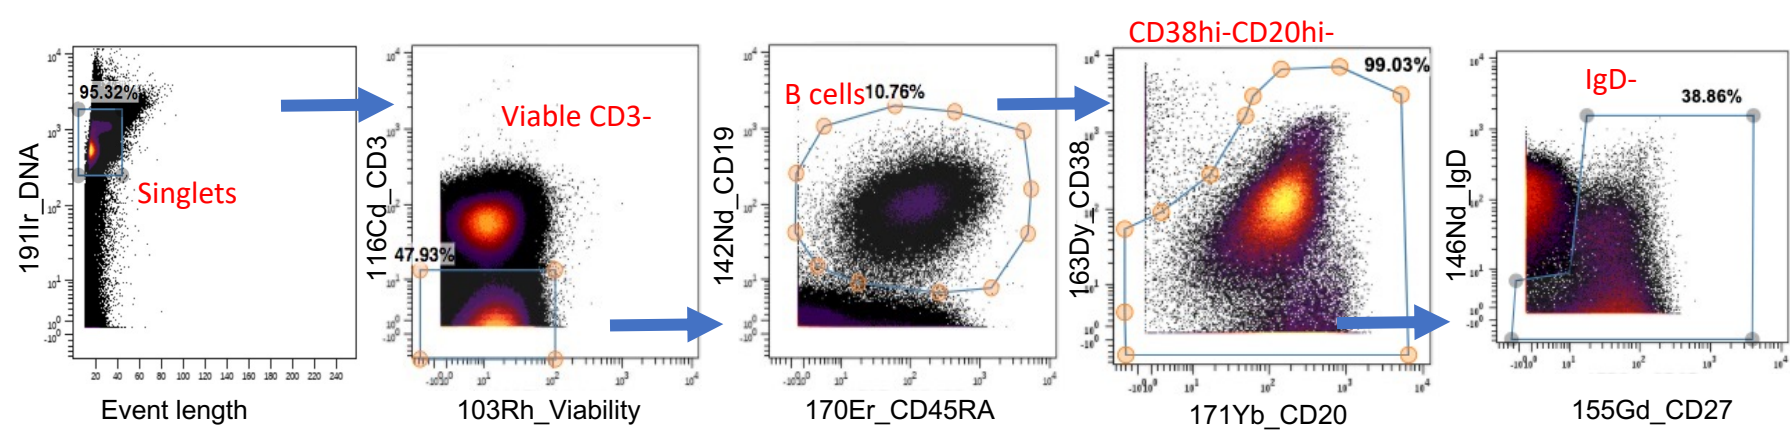

Supplementary Figure S1: Gating strategy used to identify Spike, RBD or Nucleocapside (N)-specific memory B cells.

Supplementary figure S2

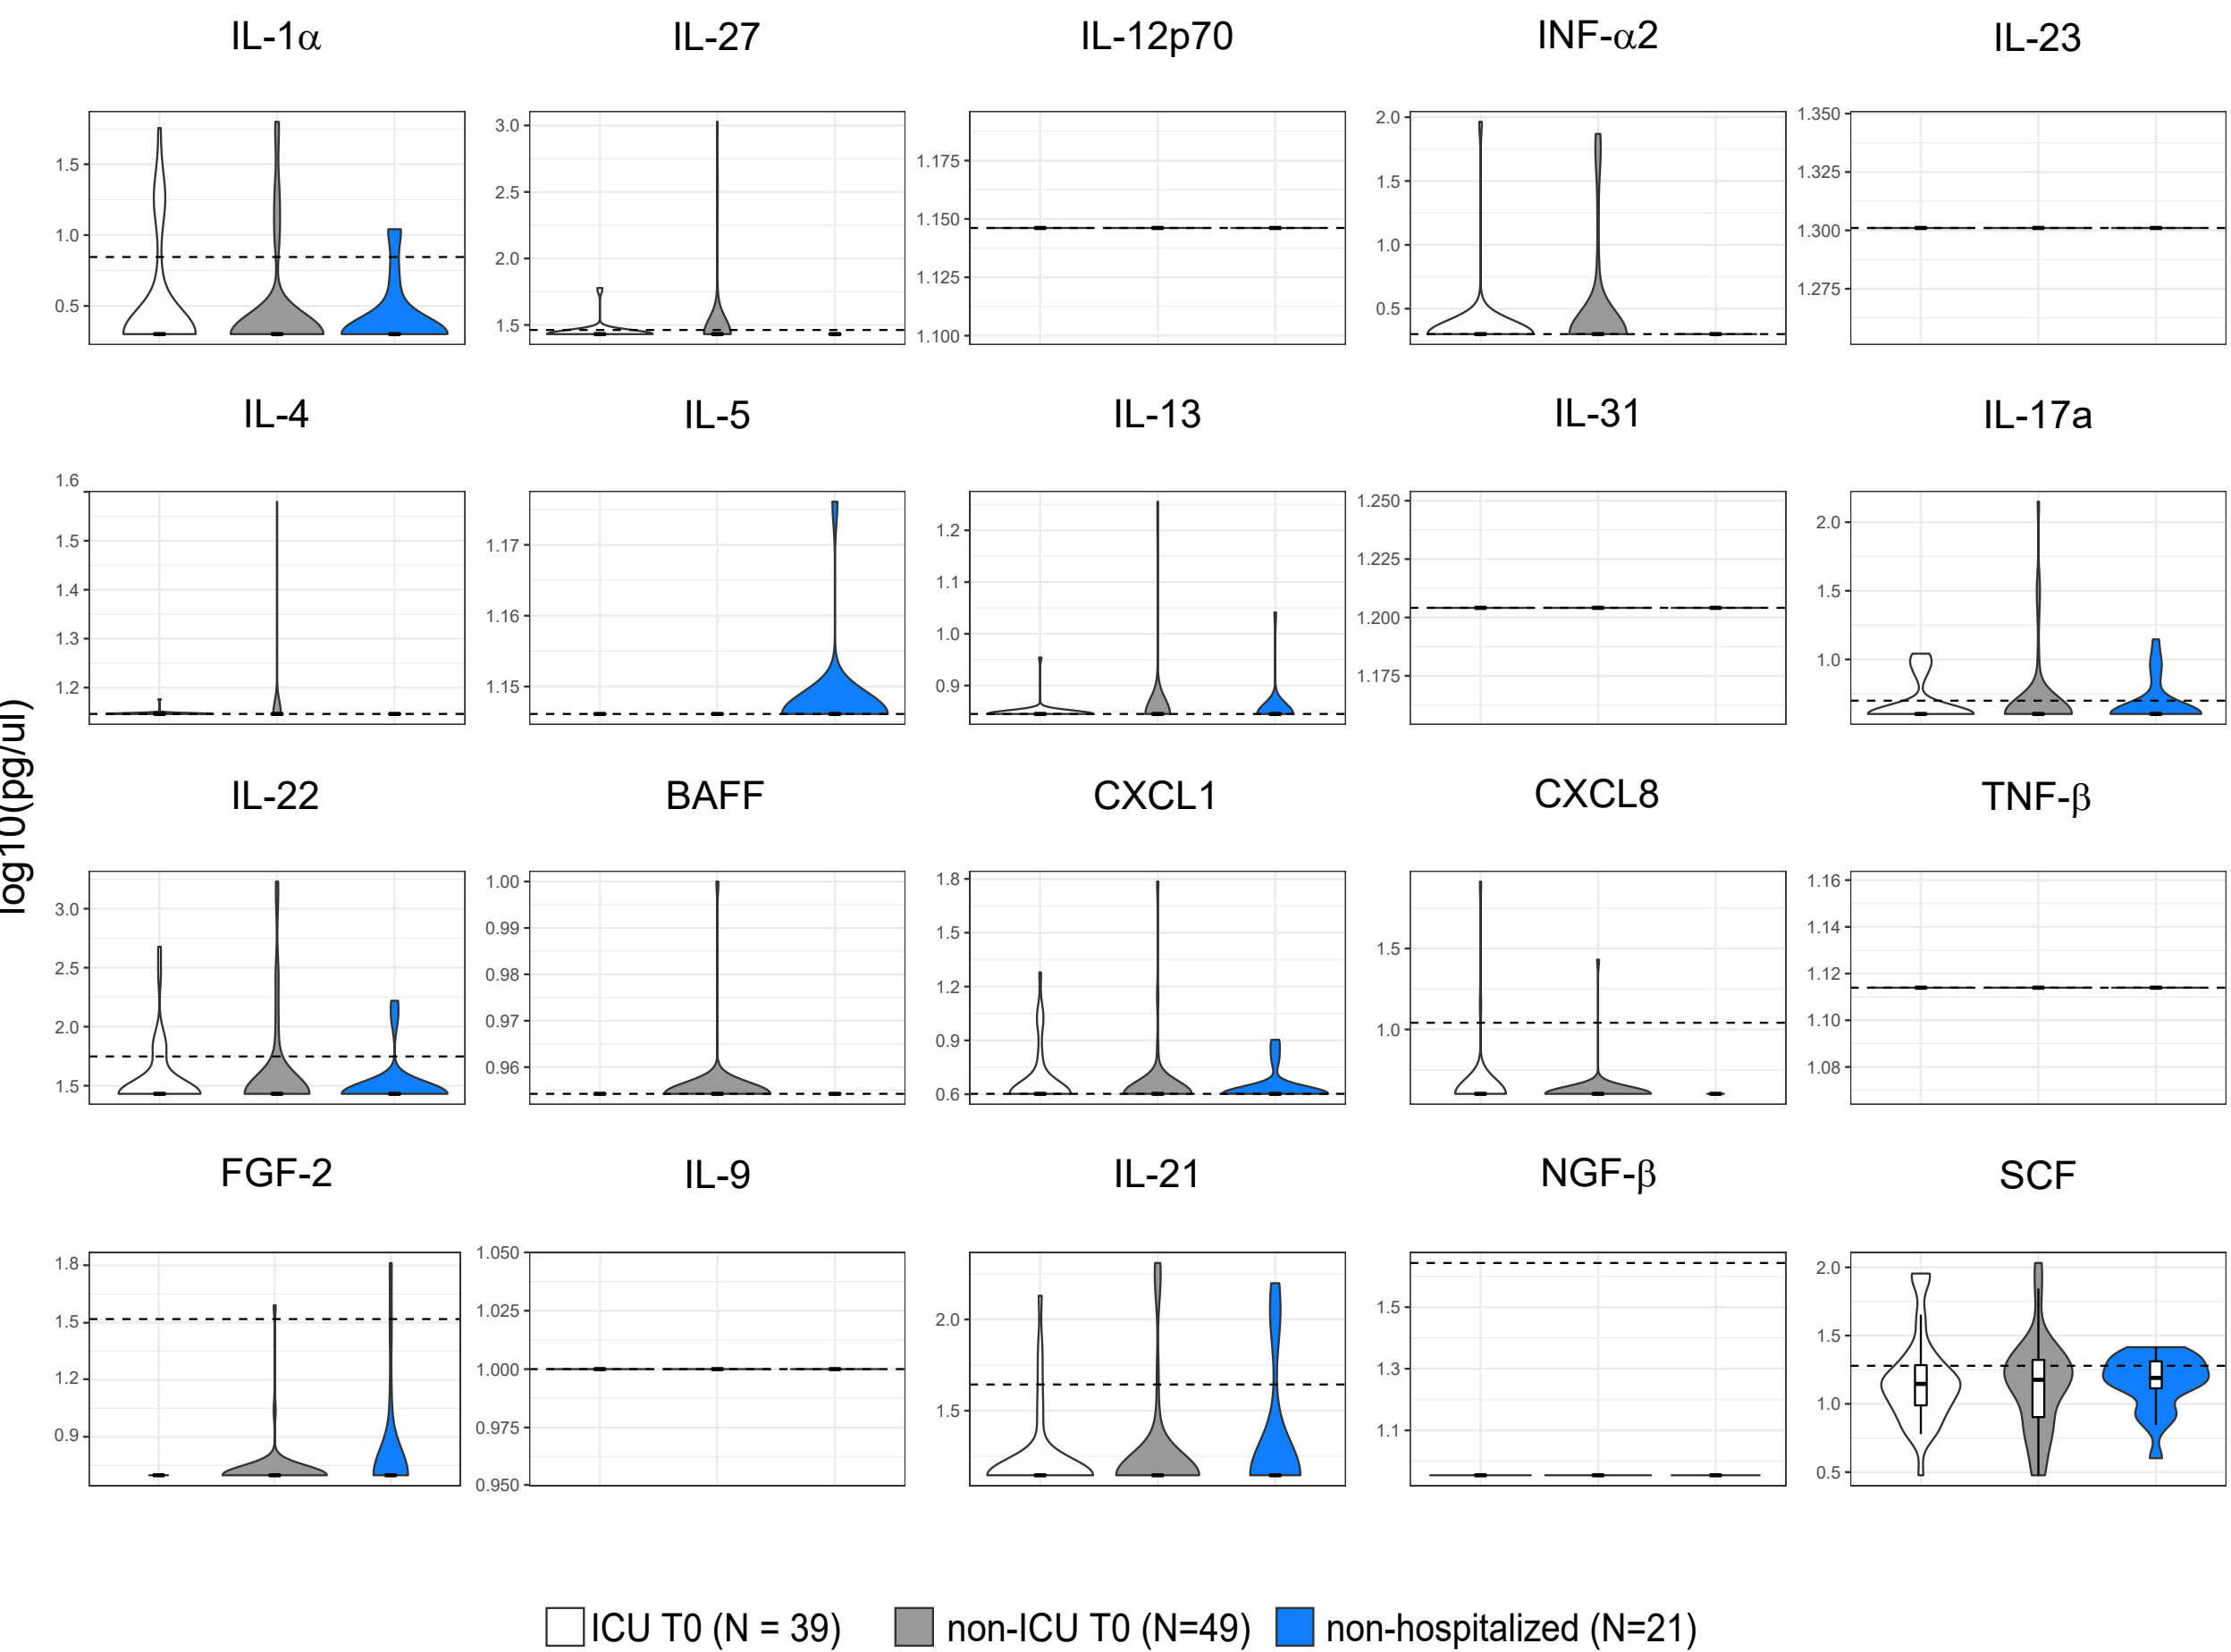

**Supplementary Figure S2:** Serum cytokine, soluble cytokine receptor, chemokine and growth factor profiles in ICU, non-ICU and non-hospitalized individuals at admission. (A) Levels of IL-1 $\alpha$ , IL-27, IL-12p70, IFN $\alpha$ , IL-23, IL-4, IL-5, IL-13, IL-31, IL-17A, BAFF, CXCL1, CXCL8, TNF- $\alpha$ , FGF-2, IL-9, IL-21, NGF-b, SCF, IL-7, CCL3) in ICU (N=39), non-ICU (N=49) and non-hospitalized (N = 22) patients at the time of the admission. Dotted line represents limit of detection. Stars indicate statistical significance between the three study groups at the time of SARS-CoV-2+ diagnosis. Statistical significance (*P* values) was obtained using Kruskal-Wallis test, using a Bonferroni correction. \*=*P*<0.05; \*\*=*P*<0.01; \*\*\*=*P*<0.001.

Supplementary figure S3

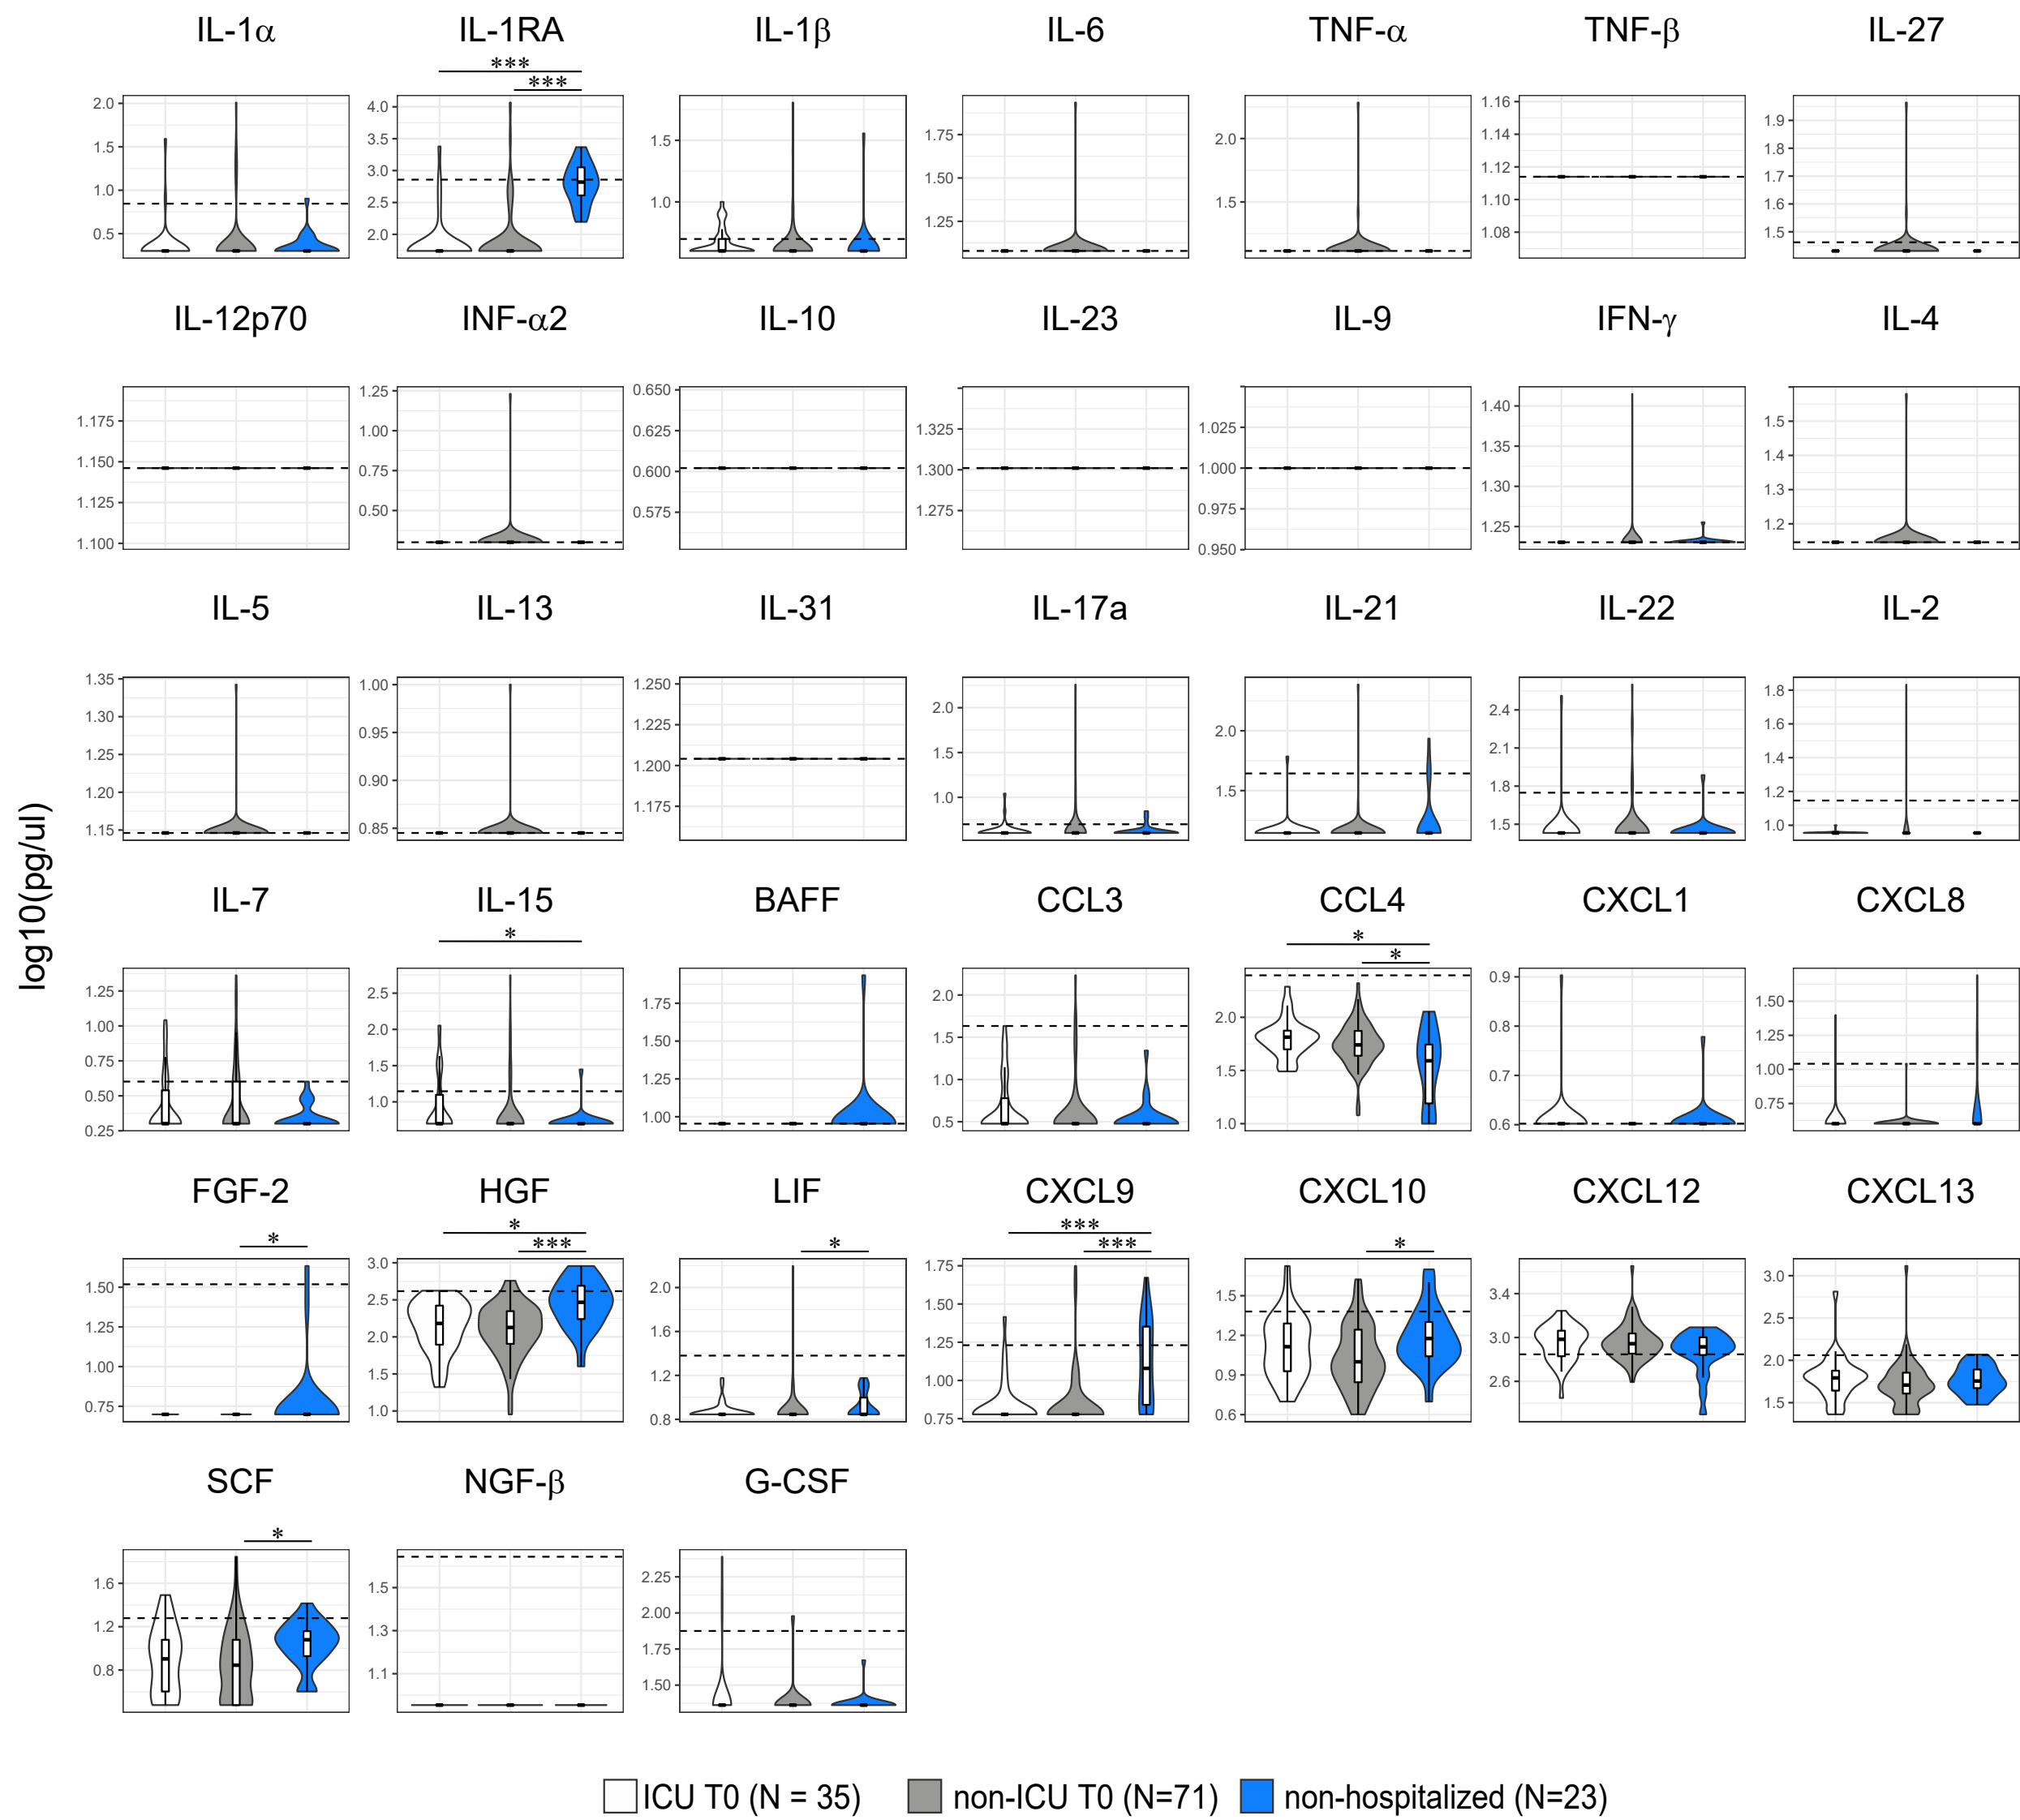

**Supplementary Figure S3:** Levels of cytokines (IL-1 $\alpha$ , IL-1 $\beta$ , IL-6, TNF- $\alpha$ , IL-27, IL-12p70, IFN $\alpha$ 2, IL-10, IL-23, IL-9, IFN- $\gamma$ , IL-4, IL-5, IL-13, IL-31, IL-17A, IL-21, IL-22, IL-2, IL-7, IL-15, BAFF, TNF- $\beta$ ), cytokine receptor (IL-1RA), chemokines (CCL3, CCL4, CXCL1, CXCL8, CXCL9, CXCL10, CXCL12, CXCL13) and growth factors (NGF- $\beta$ , FGF-2, HGF, LIF, SCF, G-CSF) at 6 months post infection in ICU (N=35), non-ICU (N=71) and non-hospitalized (N=23)). Dotted line represents limit of detection. Statistical significance ( $P$  values) was obtained using Kruskal-Wallis test, using a Bonferroni correction. \*= $P$ <0.05; \*\*= $P$ <0.01; \*\*\*= $P$ <0.001.

Supplementary Table S1: Mass  
cytometry panel

| Marker     | Isotope | Company       | catalogue number |
|------------|---------|---------------|------------------|
| CD45       | 89      | DVS           | 3089003B         |
| CD45       | 198     | Biolegend     | 304002           |
| Viability  | 103Rh   | DVS           | 201103A          |
| IgD        | 146Nd   | DVS           | 3146005B         |
| CD62L      | 153Eu   | DVS           | 3153004B         |
| HLA-DR     | 174Yb   | DVS           | 3174001B         |
| CCR6       | 141Pr   | DVS           | 3141003A         |
| CD69       | 144Nd   | DVS           | 3144018B         |
| CD21       | 152Sm   | DVS           | 3152010B         |
| CD27       | 155Gd   | DVS           | 3155001B         |
| CD10       | 158Gd   | DVS           | 3158011B         |
| CD23       | 164Dy   | DVS           | 3164018B         |
| CD20       | 171Yb   | DVS           | 3171012B         |
| CD86       | 156Gd   | DVS           | 3156008B         |
| IgM        | 172Yb   | DVS           | 3172004B         |
| IgA        | 148Nd   | DVS           | 3148007B         |
| CD25       | 149Sm   | DVS           | 3149010B         |
| CD11c      | 159Tb   | DVS           | 3159001B         |
| CD40       | 165Ho   | DVS           | 3165005B         |
| CD24       | 166Er   | DVS           | 3166007B         |
| CD19       | 142Nd   | DVS           | 3142001B         |
| CD45RA     | 170Er   | DVS           | 3170010B         |
| CD11b      | 209Bi   | DVS           | 3209003B         |
| anti PE    | 145Nd   | DVS           | 3145006B         |
| anti APC   | 176Yb   | DVS           | 3176007B         |
| anti- FITC | 160Gd   | DVS           | 3160011B         |
| CXCR3      | 154Sm   | Biolegend     | 353718           |
| CD22       | 161Dy   | Biolegend     | 363502           |
| CD38       | 163Dy   | Biolegend     | 303535           |
| CD95       | 168Er   | Biolegend     | 305602           |
| CD3        | 116Cd   | BD            | C06795           |
| FcRL4      | 167Er   | Biolegend     | 340202           |
| IgG        | 113     | BD            | 555784           |
| CD1c       | 143Nd   | Biolegend     | 331502           |
| PDL1       | 147Sm   | ThermoFischer | 14-5983-82       |
| PDL2       | 162Dy   | ThermoFischer | 14-5888-82       |
| CD85J      | 169Tm   | Biolegend     | 333702           |
| CD34       | 150Nd   | Biolegend     | 343502           |
